# Supplementary material for: Rates and modes of body size evolution in early carnivores and herbivores: a case study from Captorhinidae
Source: PeerJ. 2016 Jan 11;4:e1555. doi: 10.7717/peerj.1555 (PMC4715457; doi:10.7717/peerj.1555)
Supplement: Supplemental Information 2 — Data on skull length, dietary preference, presence or absence of multiple tooth rows, and age range of captorhinids used in this study. [file peerj-04-1555-s002.xlsx]

## Sheet: Supplementary Table
	Skull length (mm)	Herbivore (2)/not (1)	Multiple tooth rows (2)/not(1)	Singleton (1)/not(2)	Max First	Min First	Max Last	Min Last
Moradisaurus	410	2	2	1	254.14	252.17	254.14	252.17
Gansurhinus	169	2	2	2	268.8	265.1	254.14	252.17
Rothianiscus	265	2	2	2	272.3	270.55	272.3	268.8
Labidosaurikos	280	2	2	2	277.9	272.3	277.9	272.3
Labidosaurus	198	1	1	2	283.5	272.3	277.9	272.3
Captorhinus_magnus	78	1	1	1	289	289	289	289
Captorhinus_aguti	58	1	2	2	289	289	277.9	272.3
Saurorictus	24	1	1	1	259.8	254.14	259.8	254.14
Protocaptorhinus	50	1	1	2	283.5	277.9	283.5	272.3
Romeria_texana	54	1	1	2	292.55	286.8	290.1	286.8
Romeria_prima	53	1	1	1	292.55	286.8	292.55	286.8
Rhiodenticulatus	42	1	1	2	296.95	292.55	296.95	292.55
Concordia	38	1	1	1	303.7	298.9	303.7	298.9
Captorhinus_laticeps	73	1	1	2	283.5	277.9	283.5	272.3
Captorhinikos_chozensis	140	2	2	2	277.9	272.3	277.9	272.3
Captorhinikos_valensis	69	2	2	2	277.9	272.3	277.9	272.3
Reiszorhinus	114	1	1	2	283.5	272.3	283.5	272.3
Thuringothyris	23	1	1	1	290.1	283.5	290.1	283.5
Opisthodontosaurus	40	1	1	2	289	289	289	289
Protorothyris	NA	NA	NA	2	298.9	295	298.9	295
Paleothyris	NA	NA	NA	2	311.1	307	311.1	307
