# Supplementary material for: Rates and modes of body size evolution in early carnivores and herbivores: a case study from Captorhinidae
Source: PeerJ. 2016 Jan 11;4:e1555. doi: 10.7717/peerj.1555 (PMC4715457; doi:10.7717/peerj.1555)
Supplement: Supplemental Information 3 — Parameters of the TM1 model (the best fitting of the category 1 models) when fitted to each of the 100 time calibrated phylogenies. [file peerj-04-1555-s003.xlsx]

## Sheet: TM1_params
	Log Lik	AICc	Node of rate shift	Rate scalar
1	0.347471	6.90506	29	14.9469
2	-3.97515	15.5503	29	94.2217
3	0.475439	6.64912	29	16.4783
4	-0.48299	8.56598	29	19.7375
5	-0.00629561	7.61259	29	20.9213
6	4.01196	-0.423912	29	11.3899
7	-1.00205	9.60411	30	32.2134
8	2.40015	2.79969	29	23.953
9	0.60892	6.38216	29	17.9178
10	1.67067	4.25866	29	9.81109
11	2.94744	1.70512	29	12.8826
12	1.81088	3.97825	29	19.9275
13	2.82579	1.94841	29	14.3353
14	3.22782	1.14437	29	12.1368
15	1.5629	4.47421	29	12.9665
16	1.79408	4.01184	29	11.6691
17	-3.67951	14.959	29	63.0735
18	0.262655	7.07469	29	23.9732
19	2.79491	2.01017	29	11.2906
20	1.86247	3.87507	29	25.0454
21	0.39713	6.80574	29	20.1892
22	2.69312	2.21375	29	9.04667
23	-1.07108	9.74216	30	17.4276
24	2.17119	3.25762	29	15.3261
25	-0.600377	8.80075	29	21.5518
26	3.519	0.562004	29	9.79518
27	-0.0287529	7.65751	29	15.2722
28	-2.28632	12.1726	29	52.5932
29	2.8144	1.9712	29	14.5205
30	2.35139	2.89722	29	11.7032
31	3.36233	0.875337	29	10.1385
32	1.60794	4.38411	29	10.7361
33	1.57025	4.4595	29	16.4194
34	2.45181	2.69637	29	12.403
35	2.60509	2.38981	29	10.5556
36	3.58793	0.424146	29	12.302
37	1.98384	3.63232	29	10.7628
38	-1.97736	11.5547	29	31.9598
39	1.53764	4.52471	29	9.88882
40	2.95385	1.6923	29	11.0688
41	2.05544	3.48911	24	31.831
42	2.68844	2.22312	29	9.19617
43	2.7186	2.16281	29	21.3091
44	1.44607	4.70787	29	12.2523
45	0.220989	7.15802	29	12.6632
46	1.35636	4.88729	29	16.7617
47	1.49218	4.61564	29	15.7567
48	-0.513686	8.62737	29	15.7882
49	2.1283	3.3434	29	19.5155
50	2.72608	2.14785	29	12.7577
51	0.8904	5.8192	29	11.9235
52	2.56323	2.47354	29	11.1609
53	0.997912	5.60418	29	13.3735
54	2.15967	3.28066	29	15.5969
55	2.22615	3.1477	29	15.3803
56	2.63671	2.32658	29	13.7661
57	-3.06271	13.7254	30	82.6128
58	-0.805478	9.21096	29	32.117
59	1.11132	5.37736	29	12.1312
60	-3.39348	14.387	30	38.8294
61	1.36865	4.8627	29	13.9775
62	2.03402	3.53195	29	19.1883
63	-0.70576	9.01152	29	24.8815
64	-0.357225	8.31445	29	27.5218
65	2.51241	2.57517	29	13.663
66	0.021506	7.55699	29	26.3084
67	2.22043	3.15914	29	12.468
68	-2.1418	11.8836	30	50.048
69	2.1919	3.21621	24	22.2396
70	1.51784	4.56431	29	12.4039
71	-1.28861	10.1772	29	29.7644
72	0.7447	6.1106	29	14.677
73	2.8547	1.8906	29	15.1374
74	0.57696	6.44608	29	28.4227
75	2.02224	3.55553	29	15.8282
76	2.30574	2.98851	29	11.3616
77	1.42413	4.75174	29	13.4457
78	2.48419	2.63163	29	12.9295
79	2.72332	2.15336	29	12.4423
80	3.00115	1.5977	29	12.2365
81	1.29608	5.00785	29	16.2054
82	2.22661	3.14679	29	9.64214
83	0.614278	6.37144	29	20.2999
84	1.44393	4.71214	29	13.8755
85	-1.38084	10.3617	29	40.952
86	2.68866	2.22268	29	12.2304
87	-0.544917	8.68983	29	27.9799
88	2.69206	2.21587	29	17.9364
89	-0.770364	9.14073	30	27.6214
90	-1.02465	9.6493	29	33.4136
91	0.258671	7.08266	29	16.298
92	2.2145	3.17099	29	8.91094
93	1.60512	4.38977	29	11.7286
94	1.95023	3.69954	29	11.7771
95	-4.07889	15.7578	30	143.495
96	1.64814	4.30371	29	13.7423
97	3.37531	0.849376	29	10.7414
98	0.489331	6.62134	29	20.489
99	2.00737	3.58526	29	16.356
100	0.181452	7.2371	29	16.8446
