# Supplementary material for: Rates and modes of body size evolution in early carnivores and herbivores: a case study from Captorhinidae
Source: PeerJ. 2016 Jan 11;4:e1555. doi: 10.7717/peerj.1555 (PMC4715457; doi:10.7717/peerj.1555)
Supplement: Supplemental Information 4 — Parameters of the OU-M model (the best fitting of the category 2 models) when fitted to each of the 100 time calibrated phylogenies. [file peerj-04-1555-s004.xlsx]

## Sheet: oum_params
	Log Lik	AICc	alpha	sigma sq	theta carn	theta herb
1	1.06963	8.71788	0.426628	0.0515936	1.64076	2.28643
2	0.777446	9.30225	3.07028	0.358067	1.69279	2.18422
3	0.632352	9.59244	0.340669	0.0431607	1.60608	2.31826
4	0.318066	10.221	1.52972	0.189741	1.69222	2.27593
5	1.25169	8.35377	0.62311	0.0732747	1.65686	2.2896
6	2.63436	5.58843	0.248311	0.0294061	1.57641	2.382
7	0.270937	10.3153	4.4535	0.548232	1.69624	2.2827
8	0.529799	9.79754	0.399328	0.0538662	1.61941	2.37232
9	0.481225	9.89469	0.456885	0.0584941	1.63966	2.25382
10	2.1115	6.63415	0.289444	0.0313824	1.58791	2.30493
11	2.32977	6.19761	0.277974	0.0301969	1.59048	2.30262
12	0.65278	9.55158	0.468306	0.0575689	1.63981	2.32732
13	1.41696	8.02322	0.369164	0.0415919	1.61053	2.32609
14	1.94763	6.96189	0.305885	0.0335617	1.60747	2.28213
15	1.61485	7.62744	0.300958	0.0340787	1.60025	2.28819
16	1.84198	7.17318	0.33764	0.0369305	1.61192	2.31485
17	0.370806	10.1155	5.38861	0.662965	1.69455	2.26854
18	0.585012	9.68712	0.671382	0.0817841	1.65885	2.26062
19	1.68655	7.48403	0.30025	0.0333445	1.59281	2.32374
20	2.79695	5.26324	0.842534	0.0818184	1.66575	2.2393
21	-1.57248	14.0021	0.147907	0.0282053	1.55991	2.24604
22	2.5687	5.71973	0.252438	0.0262282	1.5689	2.32458
23	0.67529	9.50656	0.715474	0.0896118	1.66572	2.26265
24	0.43001	9.99712	0.404821	0.051616	1.62345	2.33515
25	0.257582	10.342	0.9084	0.11673	1.67002	2.28455
26	2.05809	6.74096	0.241514	0.0275959	1.57538	2.34183
27	1.10599	8.64517	0.487131	0.058173	1.64154	2.26163
28	0.32398	10.2092	3.58492	0.442867	1.69467	2.27463
29	1.8848	7.08754	0.373342	0.0401877	1.61768	2.27459
30	1.22741	8.40232	0.314886	0.0374306	1.59947	2.35165
31	3.01203	4.83309	0.196612	0.0222538	1.56009	2.30048
32	2.193	6.47114	0.338151	0.0392205	1.60554	2.30488
33	1.04697	8.76321	0.450075	0.0546039	1.62605	2.30454
34	0.92527	9.0066	0.354718	0.0435096	1.61849	2.34355
35	1.58872	7.6797	0.344892	0.038319	1.61352	2.30227
36	1.38388	8.08938	0.272053	0.0315944	1.58881	2.34967
37	1.67554	7.50605	0.333747	0.0375096	1.60566	2.29127
38	2.10936	6.63843	1.31423	0.12997	1.65743	2.128
39	1.40836	8.04042	0.339755	0.0387585	1.59568	2.32288
40	1.32771	8.20172	0.38227	0.0434576	1.61666	2.30968
41	3.11843	4.62029	0.308983	0.0338796	1.59386	2.29921
42	1.43708	7.98298	0.32118	0.0370673	1.59576	2.32722
43	1.16876	8.51962	0.391619	0.0475652	1.62099	2.371
44	1.02961	8.79793	0.342304	0.0428541	1.61033	2.33231
45	0.728083	9.40098	0.45442	0.0554841	1.62803	2.3323
46	-0.246371	11.3499	0.361681	0.049599	1.62248	2.37125
47	0.89773	9.06168	0.411632	0.049931	1.62901	2.31151
48	0.211717	10.4337	1.66716	0.199856	1.68221	2.27335
49	2.77597	5.30521	0.606575	0.0596834	1.65175	2.2788
50	1.84463	7.16789	0.260521	0.0292749	1.58481	2.35775
51	0.7647	9.32774	0.386894	0.047542	1.61837	2.33669
52	2.09291	6.67133	0.220871	0.0257537	1.5848	2.27563
53	1.22691	8.40333	0.352606	0.0422381	1.63037	2.30264
54	1.38282	8.09149	0.331263	0.0389978	1.62229	2.31381
55	1.30341	8.25032	0.351259	0.0413179	1.62988	2.30532
56	1.94849	6.96017	0.271231	0.0309392	1.60619	2.29881
57	0.184876	10.4874	6.93961	0.883825	1.69266	2.28267
58	0.440703	9.97574	0.959675	0.121924	1.6846	2.29187
59	1.77093	7.31529	0.375853	0.0418801	1.6206	2.28188
60	0.271631	10.3139	6.1421	0.756426	1.69618	2.28268
61	0.652606	9.55193	0.473351	0.0580854	1.65902	2.31899
62	1.08954	8.67806	0.420405	0.0513495	1.63398	2.33753
63	0.438408	9.98033	0.897937	0.109412	1.67701	2.22674
64	0.871781	9.11358	1.41252	0.166912	1.6897	2.20141
65	0.76112	9.3349	0.357023	0.0435127	1.62779	2.3412
66	1.28625	8.28463	0.66899	0.0793326	1.6691	2.29319
67	0.668105	9.52093	0.291996	0.0373745	1.61449	2.38374
68	0.270544	10.3161	6.64567	0.819768	1.6959	2.28268
69	1.70662	7.4439	0.259033	0.031025	1.60523	2.35745
70	0.978982	8.89918	0.354423	0.0419521	1.61832	2.34199
71	0.300907	10.2553	3.43577	0.414089	1.70086	2.27368
72	0.523201	9.81074	0.516973	0.0636353	1.6627	2.31506
73	0.514637	9.82787	0.252466	0.0326816	1.59454	2.39122
74	2.5904	5.67634	1.03974	0.09889	1.65967	2.21169
75	0.617264	9.62261	0.418431	0.0531283	1.63803	2.33785
76	1.82201	7.21312	0.16557	0.0202478	1.58093	2.32995
77	0.183461	10.4902	0.292643	0.0393514	1.60667	2.39136
78	3.5894	3.67834	0.529033	0.0469833	1.62513	2.27437
79	2.07445	6.70824	0.249692	0.0272592	1.60533	2.31971
80	1.25869	8.33977	0.262217	0.0314091	1.60677	2.36386
81	0.67664	9.50386	0.45443	0.0570303	1.6479	2.32773
82	2.1431	6.57095	0.324054	0.0358244	1.61716	2.33002
83	0.34488	10.1674	1.88277	0.224803	1.70162	2.26503
84	1.2777	8.30175	0.445715	0.0517875	1.65418	2.30518
85	0.457162	9.94282	3.82287	0.460032	1.69697	2.25959
86	1.94269	6.97177	0.250182	0.0282824	1.58831	2.34888
87	0.484498	9.88815	0.820287	0.103942	1.68115	2.29067
88	1.88001	7.09712	0.394813	0.04375	1.64176	2.254
89	0.62175	9.61364	0.939078	0.11854	1.68131	2.28781
90	1.01656	8.82403	1.53728	0.179874	1.6896	2.24795
91	0.814088	9.22897	0.427417	0.0530802	1.64543	2.27603
92	1.78453	7.28809	0.314266	0.0356765	1.61311	2.31702
93	1.8576	7.14194	0.333621	0.0368489	1.61526	2.29602
94	3.01335	4.83044	0.445269	0.0421024	1.63618	2.24032
95	-0.263945	11.385	6.77308	0.934975	1.6904	2.28267
96	1.14148	8.57419	0.376886	0.044821	1.63334	2.30551
97	1.8684	7.12035	0.292233	0.0334069	1.61121	2.33533
98	1.52404	7.80907	0.589344	0.0666844	1.65881	2.20611
99	1.67854	7.50007	0.439738	0.0490373	1.64674	2.2835
100	1.44941	7.95832	0.44647	0.0529472	1.64381	2.29154
