# Supplementary material for: Rates and modes of body size evolution in early carnivores and herbivores: a case study from Captorhinidae
Source: PeerJ. 2016 Jan 11;4:e1555. doi: 10.7717/peerj.1555 (PMC4715457; doi:10.7717/peerj.1555)
Supplement: Supplemental Information 5 — Parameters of the Rate Shift model with a shift ath the end of the Sakmarian (the best fitting of the category 3 models) when fitted to each of the 100 time calibrated phylogenies. [file peerj-04-1555-s005.xlsx]

## Sheet: RSsak_params
	Log Lik	AICc	theta	sigma 1	sigma 2
1	0.422063	6.75587	1.58176	0.000457014	0.0224173
2	-8.55608	24.7122	1.59004	0.000108103	0.106852
3	0.0706791	7.45864	1.58894	0.000597778	0.024085
4	-1.40409	10.4082	1.59042	0.000247649	0.0280493
5	-1.22392	10.0478	1.58556	0.00048902	0.0258403
6	4.12075	-0.6415	1.58375	0.000107943	0.0183468
7	-4.58115	16.7623	1.5902	8.79199e-05	0.0460161
8	1.03878	5.52244	1.58511	8.886e-05	0.0258459
9	-0.0252538	7.65051	1.58281	0.000491471	0.023254
10	1.47979	4.64042	1.58704	0.000803235	0.0152769
11	3.47854	0.642925	1.58688	0.000493803	0.0158166
12	0.245512	7.10898	1.58537	0.000507719	0.0188388
13	1.30095	4.99811	1.58904	0.000743018	0.0142015
14	2.40149	2.79702	1.5512	0.00103493	0.0141643
15	1.0689	5.4622	1.58812	0.000625783	0.0162453
16	1.823	3.954	1.58366	0.0005862	0.0161211
17	-7.75006	23.1001	1.58652	9.5789e-05	0.0682327
18	-0.287304	8.17461	1.58556	0.00052658	0.0306939
19	1.68057	4.23886	1.5846	0.000829929	0.0128101
20	0.200375	7.19925	1.58582	0.000541621	0.0253062
21	-0.720162	9.04032	1.5798	0.000718676	0.0267471
22	2.25829	3.08343	1.58426	0.000843504	0.012443
23	-1.37163	10.3433	1.58664	8.40947e-05	0.0324511
24	1.35348	4.89304	1.58521	0.00058154	0.0182394
25	-1.74901	11.098	1.59164	0.000163925	0.0293058
26	4.3941	-1.1882	1.58479	0.000552719	0.0136598
27	-1.0724	9.74479	1.58985	0.000645905	0.0220356
28	-5.47958	18.5592	1.58621	8.77e-05	0.0490154
29	1.65819	4.28362	1.59016	0.000637487	0.0142753
30	3.26135	1.07729	1.58947	0.000509287	0.0166512
31	3.73487	0.130262	1.58884	0.000729843	0.0156179
32	0.855501	5.889	1.5522	0.000830499	0.0192757
33	0.715223	6.16955	1.58479	0.000617023	0.020325
34	3.33919	0.921627	1.57853	0.00051601	0.0182092
35	2.45267	2.69466	1.58633	0.000591188	0.0129911
36	2.60776	2.38448	1.58611	0.000652438	0.0122462
37	1.79252	4.01497	1.58665	0.000672885	0.0156282
38	-4.95032	17.5006	1.59116	0.00104143	0.046281
39	1.46241	4.67518	1.58887	0.000751647	0.0151714
40	2.48736	2.62529	1.57356	0.000772563	0.0136921
41	3.40634	0.78732	1.5856	7.22156e-05	0.0177075
42	3.64547	0.309067	1.58123	0.000614138	0.0154253
43	2.10476	3.39048	1.5886	0.000535128	0.0239208
44	2.34185	2.9163	1.59151	0.000546562	0.020415
45	0.723392	6.15322	1.58689	0.000100176	0.0221113
46	1.64939	4.30121	1.58838	0.000488492	0.0216348
47	0.0912156	7.41757	1.58563	0.000629211	0.0172271
48	-0.102088	7.80418	1.58637	7.97523e-05	0.0270642
49	0.844388	5.91122	1.58785	0.000513443	0.0201591
50	2.08982	3.42035	1.58667	0.000741225	0.0155259
51	0.722956	6.15409	1.58795	0.000567487	0.0179121
52	3.71958	0.160845	1.59632	0.000485976	0.0166541
53	0.915319	5.76936	1.59251	0.000496255	0.0198875
54	1.8844	3.8312	1.58823	0.000509081	0.0188393
55	1.72729	4.14542	1.586	0.000436584	0.0160614
56	3.05678	1.48644	1.58036	0.000510278	0.0182017
57	-11.5297	30.6594	1.58895	0.000112886	0.102352
58	-2.59972	12.7994	1.58683	0.000110832	0.0331757
59	0.797832	6.00434	1.59166	0.000563281	0.0173987
60	-6.89979	21.3996	1.59219	0.000108706	0.0615139
61	0.649409	6.30118	1.56619	0.000768389	0.0187061
62	2.31441	2.97119	1.59096	0.000403467	0.0220969
63	-1.84732	11.2946	1.59094	0.000511413	0.0316526
64	-1.60245	10.8049	1.58752	8.6305e-05	0.0336605
65	1.66308	4.27384	1.589	0.000563761	0.0151054
66	-1.0758	9.75159	1.59052	0.000117352	0.0306108
67	3.28304	1.03392	1.59397	0.000464299	0.0176659
68	-8.29944	24.1989	1.57965	0.000117089	0.0813264
69	3.29541	1.00918	1.58994	0.000110476	0.014369
70	0.985605	5.62879	1.59657	0.00070384	0.0164621
71	-2.77303	13.1461	1.5846	0.000104619	0.0448162
72	2.2714	3.05721	1.58766	0.000372439	0.0221822
73	1.8587	3.88261	1.59184	0.000580968	0.0149753
74	-0.995693	9.59139	1.59612	0.000508862	0.029826
75	2.36993	2.86014	1.58773	0.000502692	0.0214883
76	2.78586	2.02828	1.56844	0.000680339	0.0160961
77	1.25979	5.08041	1.59297	0.000110793	0.0184266
78	3.34819	0.903614	1.5924	0.000482582	0.0182071
79	2.4744	2.6512	1.58965	0.000481187	0.0132201
80	3.25932	1.08137	1.59014	0.000505971	0.0143703
81	2.25848	3.08303	1.58947	0.000389191	0.0210375
82	2.89849	1.80303	1.58848	0.000102382	0.0149499
83	-0.273462	8.14692	1.59231	0.000464758	0.0240174
84	1.8988	3.80241	1.58542	0.000453863	0.01838
85	-3.84843	15.2969	1.58662	0.000105393	0.040054
86	2.26114	3.07773	1.58981	0.000712626	0.0156651
87	-2.16941	11.9388	1.59056	0.000102775	0.0306965
88	3.25547	1.08905	1.59101	0.000362031	0.0186065
89	-3.35642	14.3128	1.58914	8.9954e-05	0.0367368
90	-2.7186	13.0372	1.58927	8.85415e-05	0.0436184
91	-0.894825	9.38965	1.57792	0.00066086	0.0229356
92	3.18825	1.2235	1.55608	0.000805632	0.0160723
93	1.47346	4.65308	1.57299	0.000666235	0.0173112
94	1.83012	3.93976	1.58366	0.000687554	0.0177486
95	-15.5	38.6	1.58805	0.000101607	0.185688
96	0.804562	5.99088	1.59603	0.00059615	0.0163631
97	4.67638	-1.75275	1.5907	0.000426722	0.0136606
98	-0.588548	8.7771	1.58904	0.00042103	0.0237999
99	2.65994	2.28012	1.59542	0.000417164	0.0200551
100	0.854691	5.89062	1.59103	0.000442787	0.023849
